# Supplementary material for: Characterization of Tableware from Fábrica de Loiça de Sacavém—Linking Analytical and Documental Research
Source: MDPI journal article supplement (doi:10.3390/min14030324), 2024-03-21
Supplement: s1 [file s1]

**Table S1.** Composition (max.-min.) in oxides (wt.%) of the ceramic body (n=1) measured by EDS analysis.

| Period | Sample    | Na <sub>2</sub> O | MgO | Al <sub>2</sub> O <sub>3</sub> | SiO <sub>2</sub> | K <sub>2</sub> O | CaO | TiO <sub>2</sub> | Fe <sub>2</sub> O <sub>3</sub> | PbO |
|--------|-----------|-------------------|-----|--------------------------------|------------------|------------------|-----|------------------|--------------------------------|-----|
| MJA    | MCS1      | 1.1               | 0.1 | 20.5                           | 74.1             | 1.9              | 0.8 | 0.4              | 0.8                            | 0.3 |
| FLS    | SAC2      | 1.2               | 0.0 | 20.6                           | 73.6             | 2.1              | 0.6 | 0.8              | 0.8                            | 0.2 |
|        | SAC13     | 0.9               | 0.2 | 23.2                           | 71.0             | 2.3              | 0.9 | 0.6              | 0.9                            | 0.0 |
|        | SAC16     | 0.8               | 0.1 | 23.4                           | 71.5             | 2.4              | 0.7 | 0.3              | 0.7                            | 0.0 |
|        | CC_NEC_59 | 0.6               | 0.2 | 26.2                           | 68.6             | 1.9              | 0.8 | 0.7              | 0.7                            | 0.4 |
|        | CC_NEC_5  | 0.6               | 0.2 | 25.8                           | 68.6             | 2.7              | 0.5 | 0.6              | 0.8                            | 0.1 |
| RFS    | CC_NEC_14 | 0.8               | 0.2 | 24.7                           | 69.8             | 1.9              | 0.9 | 0.5              | 0.7                            | 0.7 |
|        | SAC14     | 0.5               | 0.2 | 21.9                           | 73.2             | 2.3              | 0.3 | 0.6              | 0.9                            | 0.2 |
|        | SAC12     | 0.5               | 0.3 | 21.4                           | 73.7             | 2.2              | 0.2 | 0.6              | 0.9                            | 0.1 |
|        | MCS9358   | 0.6               | 0.2 | 20.9                           | 74.2             | 2.1              | 0.1 | 0.5              | 0.9                            | 0.3 |
| RFS-G  | SAC1      | 0.5               | 0.1 | 16.3                           | 79.4             | 2.5              | 0.3 | 0.3              | 0.5                            | 0.2 |
